# Supplementary material for: Evaluation of Fe3O4@SiO2–MOF-177 as an advantageous adsorbent for magnetic solid-phase extraction of phenols in environmental water samples
Source: Royal Society of Chemistry journal article supplement (doi:10.1039/c4ay00822g), 2014-07-04
Supplement: c4ay00822g1.pdf [file c4ay00822g1.pdf]

## Supporting Information

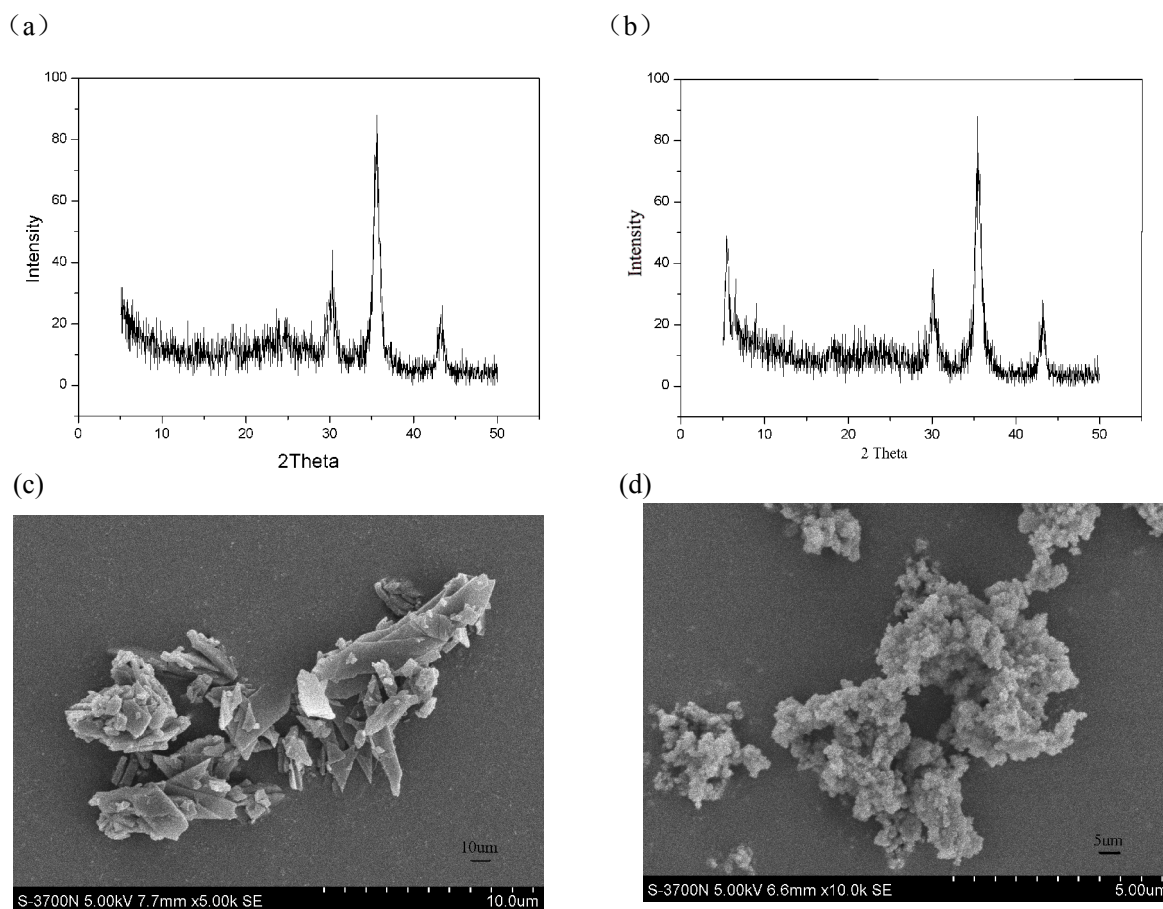

Fig.S1 X-ray diffraction spectra of Fe<sub>3</sub>O<sub>4</sub>@SiO<sub>2</sub> (a) and Fe<sub>3</sub>O<sub>4</sub>@SiO<sub>2</sub>-MOF-177 (b), and the SEM characterization of MOF-177 (c) and Fe<sub>3</sub>O<sub>4</sub>@SiO<sub>2</sub> (d).

Table.S1 Linear equations and correlation coefficients (R<sup>2</sup>) for six kinds of Phenols

| Phenols  | correlation coefficients<br>(R <sup>2</sup> ) | Linear equations        |
|----------|-----------------------------------------------|-------------------------|
| Phenol   | 0.9911                                        | Y=183.27 X + 109579.28  |
| 2-MP     | 0.9998                                        | Y=848.56 X + 12239.35   |
| 4-MP     | 0.9991                                        | Y = 856.44 X + 21327.88 |
| 2, 4-DMP | 0.9931                                        | Y = 39.6 X + 11305.65   |
| 2, 4-DCP | 0.9993                                        | Y = 328.95 X + 21193.43 |
| 3-M-4-CP | 0.9998                                        | Y = 3.847 X + 1261.29   |
